# Supplementary material
Source: PubMed Central journal article supplement (PMC3903257)
Supplement: 1312099111_sapp.pdf [file 1312099111_sapp.pdf]

## Materials and Methods

### *Cloning, expression and purification of LysM1-2 of CEBiP*

The gene portion encoding the LysM1 and LysM2 domains of CEBiP (LysM1-2, residues 85-192) was cloned in pETM-20 and the pETM-30, which contain the stabilizing Trx and GST fusion tags, respectively. For cloning, two PCR primers containing the *NcoI* (forward) and the *HindIII* (reverse) restriction sites were designed to amplify the *lysM* coding sequence starting at residue Tyr<sub>85</sub>. Two vectors of pETM series were digested with *NcoI/HindIII* and ligated to the digested PCR product by quick-ligation. After plasmid amplification and sequencing, the pETM-20 and pETM-30 expression vectors were used to transform different bacterial host strain (BL21(DE3), BL21(DE3)RP, BL21(DE3)RIL, Rosetta2(DE3), Rosetta(DE3)pLysS). The colonies were inoculated in 10 mL of LB for the small-scale expression screening. For this experiment, bacterial strains were grown at 37° C until they reached an OD<sub>600</sub> of 0.6-0.7 and then the temperature was either kept to 37 °C or decreased to 22 °C. The recombinant expression was induced with different IPTG concentration (0.2-1 mM). Frozen pellets were lysed in 1.5 mL of 50 mM Tris-HCl buffer (pH 8.0) and 150 mM NaCl or PBS buffer (10 mM phosphate buffer, pH 7.4, 2.7 mM KCl and 137 mM NaCl), containing a cocktail of proteases inhibitor (Roche). Glycerol was added to both buffers to a final concentration of 5 % (v/v). The samples were sonicated for 2 min and the total lysate samples were taken before centrifugation at 13,000 g for 30 min. The resulting supernatants were visualized by SDS-PAGE. The highest yields of protein expression and solubility were obtained using thioredoxin (Trx) as a stabilizing partner (i.e. pETM-20).

Small scale expression experiments allowed us to set best conditions for LysM1-2 expression, as fused to Trx-tag. Starting from this indication, the purification protocol was modified during large-scale purifications. Briefly, pellets from 1L bacterial culture were re-suspended in 40 mL of buffer (PBS, 10 mM Imidazole or 50 mM Tris-HCl buffer, pH 8.0, 200 mM NaCl, 10 mM imidazole) containing 5 % (v/v) of glycerol and 0.01 % (v/v) CHAPS as detergent. A protease-inhibitor cocktail (Roche Diagnostic) was added to the mixture before the sonication which was performed for 10 min in a cold water bath. The lysate was centrifuged at 18,000 rpm for 35 min, and the supernatant filtered and loaded onto a pre-equilibrated Hi-Trap chelating columns (GE Healthcare) charged with NiCl<sub>2</sub>, connected to a FPLC system. After washing with 15 volumes of binding buffer, a linear gradient of imidazole (20-300 mM) was applied to elute the protein. The fractions containing Trx-LysM protein were pooled and dialyzed against 2

L of PBS, 0.01 % CHAPS and 10 mM DTT (pH 7.2) with one exchange at 4 °C. The purification of the Trx-LysM1-2 was optimized by Superdex 200 gel filtration chromatography (10/30 column, GE Healthcare) equilibrated with the same dialysis buffer. In this step the soluble aggregates were removed from the protein sample. The homogeneity of protein was tested by SDS-PAGE. Fractions of soluble and monodisperse Trx-LysM1-2 were pooled and concentrated to 3 mg/mL for NMR experiments.

To check the correct folding of LysM1-2 domains, the homogenous fractions of Trx-LysM1-2 coming from the gel-chromatography were used for TEV cleavage. TEV protease and Trx-His-tag were removed by applying the protein mixture to a Hi-trap chelating column. The flow through was collected, concentrated and loaded again on S75 gel filtration chromatography equilibrated in 50 mM Tris-HCl, 150 mM NaCl (pH 8.0), 0.01 % (v/v) CHAPS and 10 mM DTT.

#### ***Mutant preparation for LysM1-2 of CEBiP.***

The plasmid expression vector encoding the I<sub>122</sub>A mutation was generated by site-directed mutagenesis of wild-type plasmid pETM-20-LysM1-2 using the Stratagene QuikChange kit and the mutagenic primers Fw: 5' CCC GAC CCC AAC AAG GCT AAT GTC AGC CAG ACG 3' and Rv 5' CGT CTG GCT GAC ATT AGC CTT GTT GGG GTC GGG 3'.

#### ***Circular dichroism***

To analyze the conformational state of LysM1-2 once Trx had been cleaved, far-UV CD spectra were registered at 20 °C. All CD spectra were recorded with a Jasco J-810 spectropolarimeter equipped with a Peltier temperature control system (Model PTC-423-S). Molar ellipticity per mean residue,  $[\theta]$  in deg cm<sup>2</sup>•dmol<sup>-1</sup>, was calculated from the equation:  $[\theta] = [\theta]_{\text{obs}} \cdot \text{mrw} \cdot (10 \cdot l \cdot C)^{-1}$ , where  $[\theta]_{\text{obs}}$  is the ellipticity measured in degrees, mrw is the mean residue molecular mass (108.6 Da), C is the protein concentration in g•L<sup>-1</sup> and l is the optical path length of the cell in cm. Far-UV measurements (183-250 nm) were carried out at 20 °C using a 0.1 cm optical path length cell and a protein concentration of 0.2 mg•mL<sup>-1</sup>.

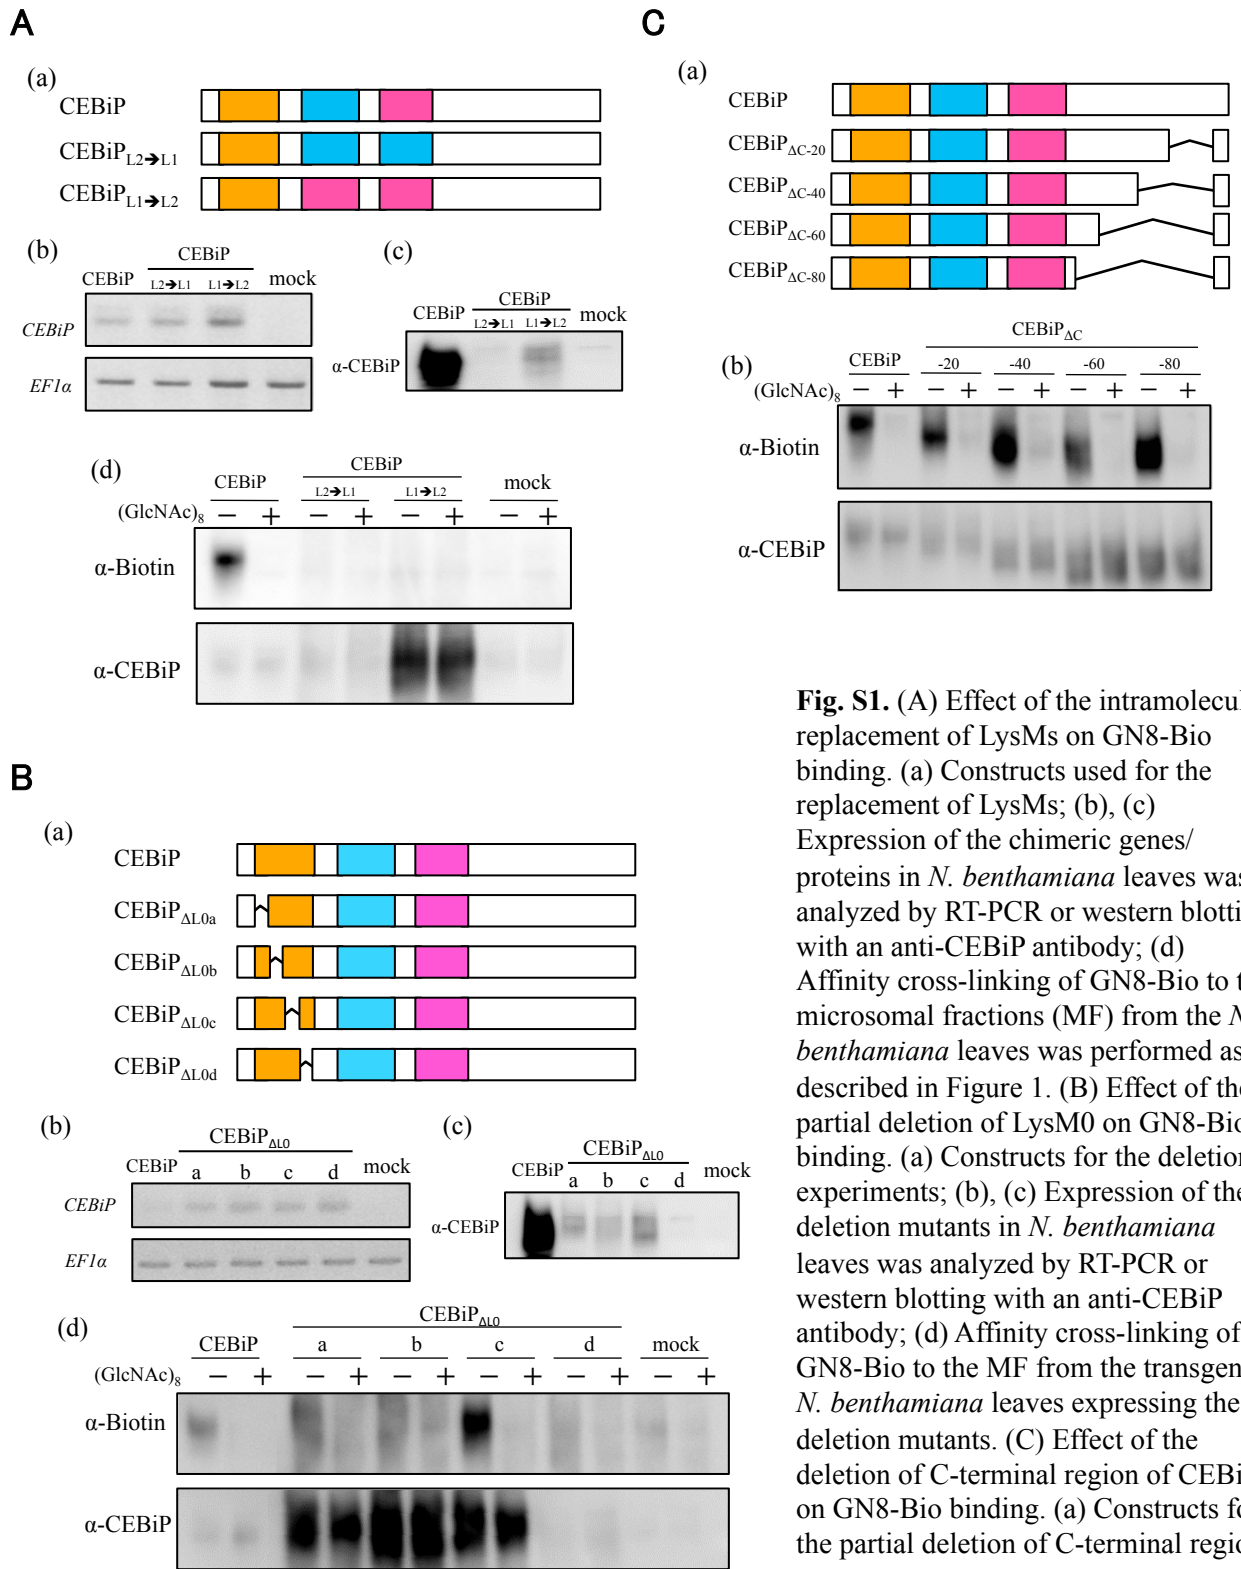

**Fig. S1.** (A) Effect of the intramolecular replacement of LysMs on GN8-Bio binding. (a) Constructs used for the replacement of LysMs; (b), (c) Expression of the chimeric genes/proteins in *N. benthamiana* leaves was analyzed by RT-PCR or western blotting with an anti-CEBiP antibody; (d) Affinity cross-linking of GN8-Bio to the microsomal fractions (MF) from the *N. benthamiana* leaves was performed as described in Figure 1. (B) Effect of the partial deletion of LysM0 on GN8-Bio binding. (a) Constructs for the deletion experiments; (b), (c) Expression of the deletion mutants in *N. benthamiana* leaves was analyzed by RT-PCR or western blotting with an anti-CEBiP antibody; (d) Affinity cross-linking of GN8-Bio to the MF from the transgenic *N. benthamiana* leaves expressing the deletion mutants. (C) Effect of the deletion of C-terminal region of CEBiP on GN8-Bio binding. (a) Constructs for the partial deletion of C-terminal region; (b) Affinity cross-linking experiments were performed as described in (A).

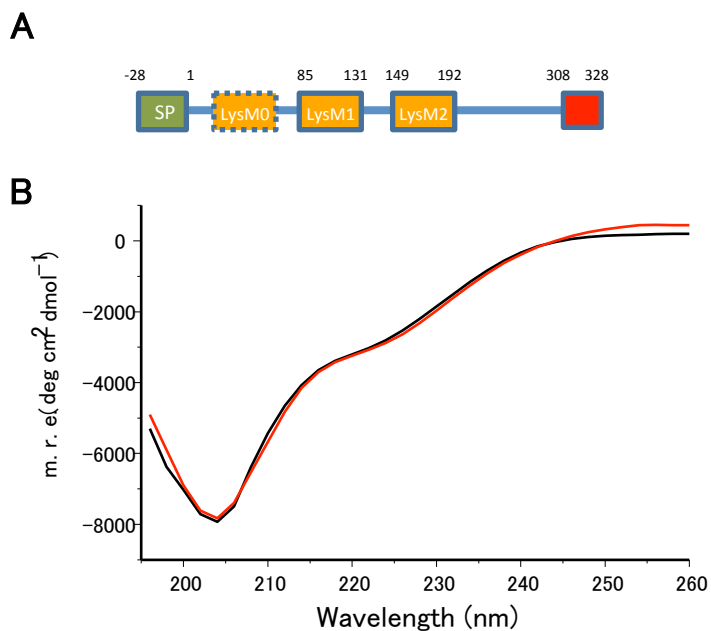

**Fig. S2.** (A) Domain organization of CEBiP according to the PFAM database (Bateman A, et al. (2004) *Nucleic Acids Res* 32:D138-141). The C-terminal transmembrane helix was predicted using TMPRED. (B) Superposition of CD spectra of LysM1-2 (black, residues 85-192) and LysM1-2 I122A mutant (red) in 50 mM Tris-HCl, 150 mM NaCl, and 5 mM DTT

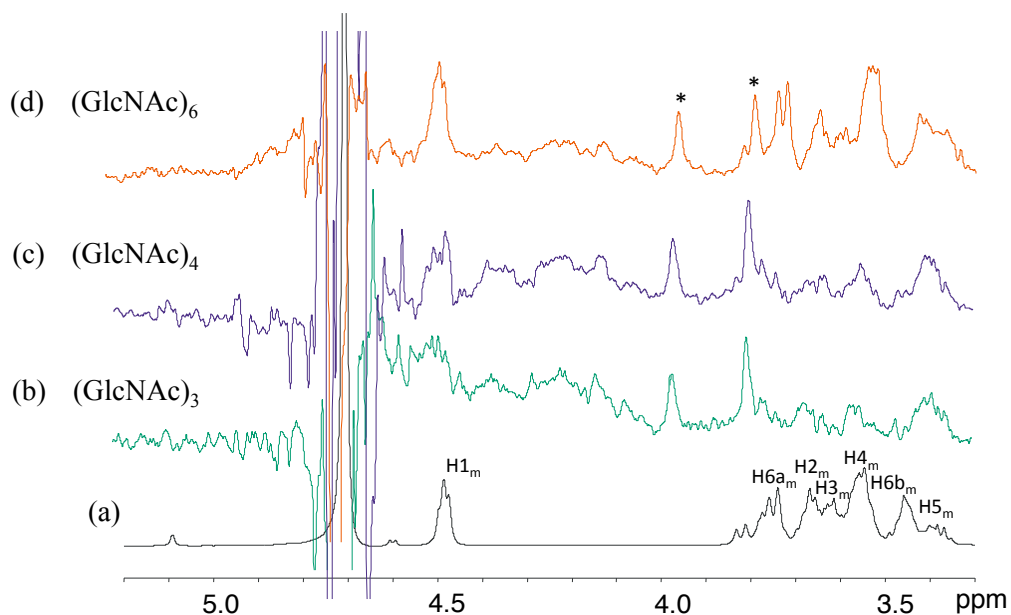

**Fig. S3.** Reference  $^1\text{H}$  NMR spectrum (a) and STD 1D NMR spectra of mixture Trx-LysM1-2 :  $(\text{GlcNAc})_3$  (b),  $(\text{GlcNAc})_4$  (c),  $(\text{GlcNAc})_6$  (d) 1:100.  
\* Residual protein signals.

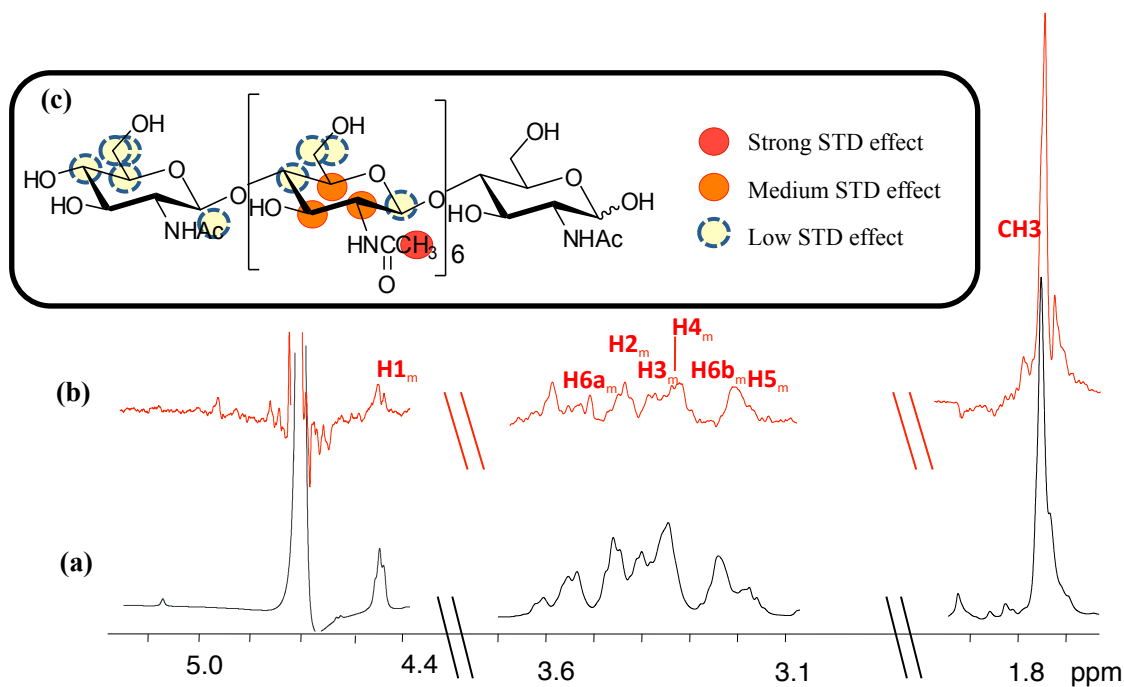

**Fig. S4.** Reference  $^1\text{H}$  NMR spectrum (a) and STDD NMR spectrum (b) of mixture Trx-LysM1-2 :  $(\text{GlcNAc})_8$  1:100. (c), Chemical structure and epitope binding of  $(\text{GlcNAc})_8$  to Trx-LysM1-2.

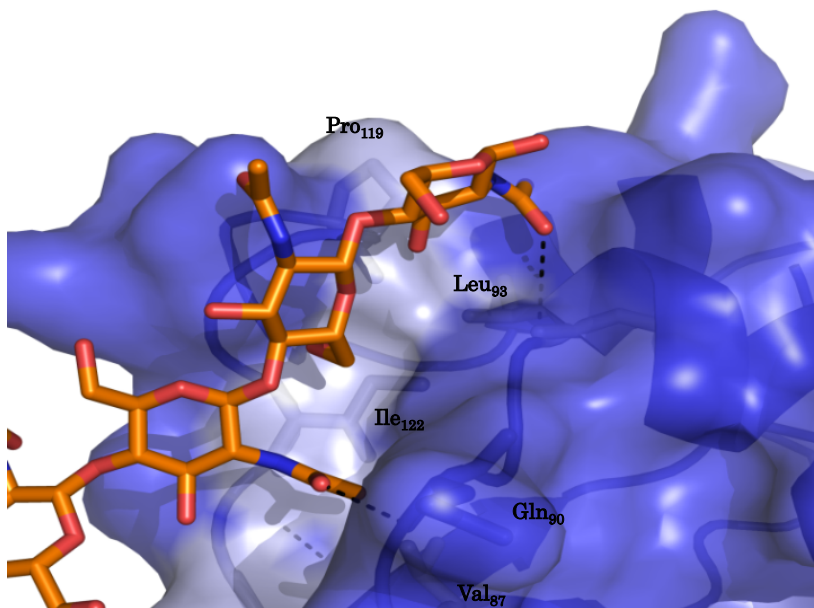

**Fig. S5.** Details of interactions of (GlcNAc)<sub>4</sub> with the LysM1 domain. Hydrogen bonds formed by the acetyl moieties are shown as dashed lines.

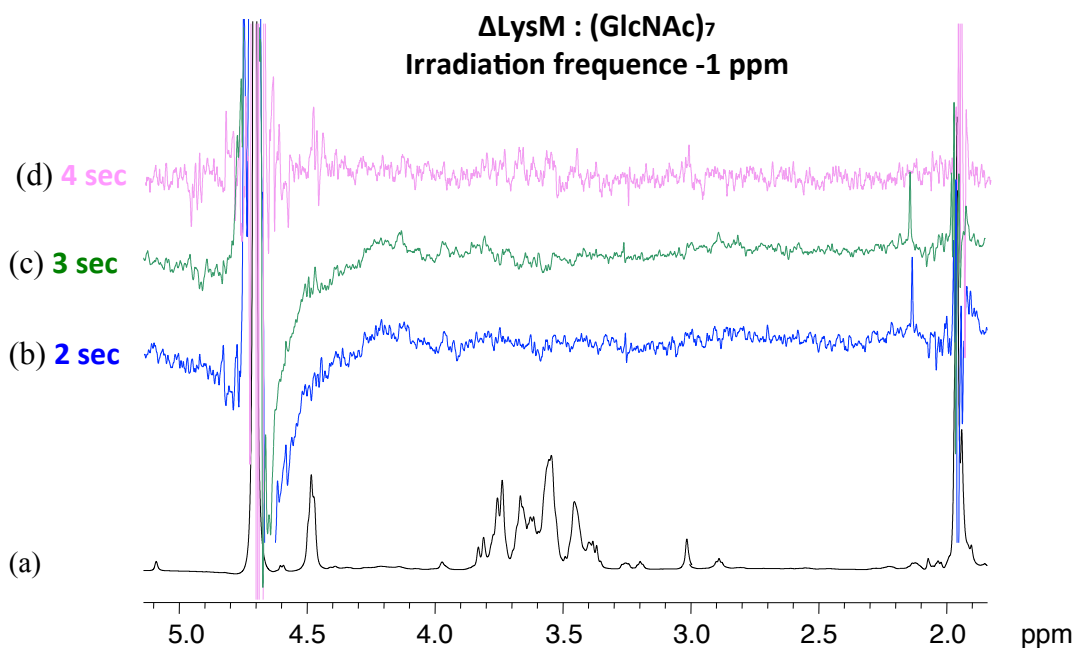

**Fig. S6.** Reference <sup>1</sup>H NMR spectrum (a) and STDD NMR spectra of mixture Trx-LysM1-2 I<sub>122</sub>A : (GlcNAc)<sub>7</sub> at saturation time of 2 sec (b), 3 sec (c), 4 sec (d).

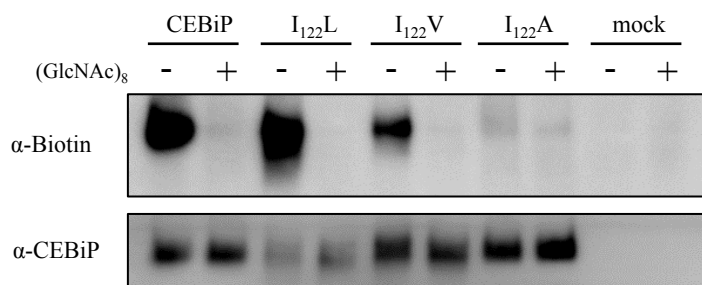

**Fig. S7.** Binding of GN8-Bio to mutant CEBiP proteins. CEBiP proteins mutated for the indicated amino acid residues were expressed in *N. benthamiana*, from which the microsomes for affinity labeling were prepared.

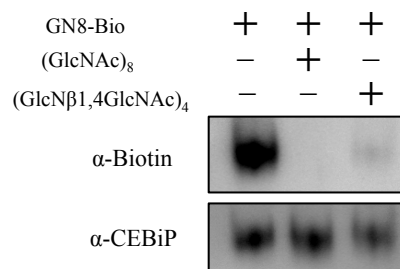

**Fig. S8.** (GlcNβ1,4GlcNAc)<sub>4</sub> inhibits the binding of GN8 to CEBiP. GN8-Bio (0.04 μM) was mixed with the MF in the presence (+) or absence (-) of 4 μM (GlcNAc)<sub>8</sub> or (GlcNβ1,4GlcNAc)<sub>4</sub> as a competitor.

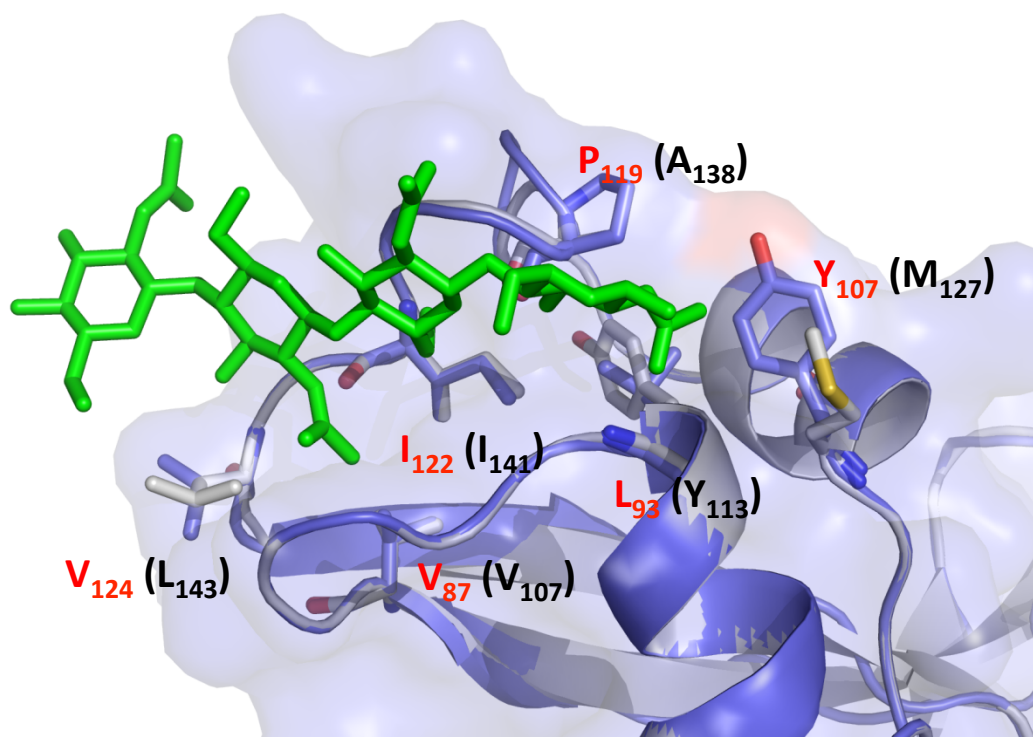

**Fig. S9.** Residues involved in chitin binding in CEBiP and in CERK1. Superposition of sugar binding sites in CERK1 crystal structure (grey) and CEBiP model (blue). Main residues involved in binding and the sugar ligand are shown in ball-and-stick representation. Red labels represent residue numbers in CEBiP whereas black labels are for those in CERK1.



**Table S1.** NMR assignments of hepta-chitooligosaccharide in D<sub>2</sub>O

| Heptamer | <sup>1</sup> H1<br>/ <sup>13</sup> C1 | <sup>1</sup> H2<br>/ <sup>13</sup> C2 | <sup>1</sup> H3<br>/ <sup>13</sup> C3 | <sup>1</sup> H4<br>/ <sup>13</sup> C4 | <sup>1</sup> H5<br>/ <sup>13</sup> C5 | <sup>1</sup> H6<br>/ <sup>13</sup> C6 | CH <sub>3</sub> |
|----------|---------------------------------------|---------------------------------------|---------------------------------------|---------------------------------------|---------------------------------------|---------------------------------------|-----------------|
| α        | 5.09                                  | 3.78                                  | 3.59                                  | 3.53                                  | 3.78                                  | 3.77/3.55                             | 1.96            |
|          | 90.3                                  | 53.7                                  | 72.3                                  | 78.8                                  | 69.8                                  | 59.86                                 | 22.38           |
| β        | 4.60                                  | 3.59                                  | 3.58                                  | 3.52                                  | 3.42                                  | 3.75/3.58                             | 1.97            |
|          | 94.6                                  | 56.2                                  | 72.3                                  | 79.1                                  | 74.6                                  | 59.9                                  | 22.38           |
| m        | 4.49                                  | 3.64                                  | 3.63                                  | 3.47                                  | 3.46                                  | 3.84/3.65                             | 1.97            |
|          | 101.2                                 | 55.2                                  | 72                                    | 78.8                                  | 74.5                                  | 60.6                                  | 22.38           |
| n        | 4.46                                  | 3.68                                  | 3.49                                  | 3.38                                  | 3.40                                  | 3.84/3.65                             | 1.97            |
|          | 100.9                                 | 54.9                                  | 73.3                                  | 69.4                                  | 75.7                                  | 60.6                                  | 22.38           |

α or β, reducing end α or β anomer residue; m, middle residue; n, non-reducing end residue.

**Table S2.** Experimental STD intensities of (GlcNAc)<sub>7</sub> bound to LysM at different saturation times

STD<sub>max</sub> and K<sub>sat</sub> were calculated by fitting the data to a monoexponential equation:

$$\text{STD} = \text{STD}_{\text{max}} (1 - \exp(-k_{\text{sat}} t))$$

| <u>Protons of<br/>internal<br/>GlcNAc</u> | <u>Experimental STD%</u> |      |      |      | STD <sub>max</sub> | K <sub>sat</sub> | STD (fit)<br><u>Slope of curve</u><br>at t <sub>sat</sub> =0 | STD<br>epitopes<br>(fit)% |
|-------------------------------------------|--------------------------|------|------|------|--------------------|------------------|--------------------------------------------------------------|---------------------------|
|                                           | 1sec                     | 2sec | 3sec | 4sec |                    |                  |                                                              |                           |
| <b>H1<sub>m</sub></b>                     | 30                       | 25   | 40.8 | 57   | 0.2905             | 0.2287           | 0.066                                                        | 32.9 %                    |
| <b>H2<sub>m</sub></b>                     | 43.5                     | 35   | 61.2 | 73   | 0.6243             | 0.1702           | 0.106                                                        | 52.8 %                    |
| <b>H3<sub>m</sub></b>                     | 51.6                     | 47.5 | 73.5 | 80.9 | 0.5924             | 0.2258           | 0.133                                                        | 66.3 %                    |
| <b>H4<sub>m</sub></b>                     | 36.6                     | 30   | 46.9 | 58.7 | 0.5259             | 0.1574           | 0.082                                                        | 40.9 %                    |
| <b>H5<sub>m</sub></b>                     | 48.3                     | 40   | 57.1 | 63.5 | 0.4962             | 0.2002           | 0.099                                                        | 49.3 %                    |
| <b>H6a<sub>m</sub></b>                    | 34                       | 27.5 | 40.8 | 46   | 0.3524             | 0.2057           | 0.072                                                        | 35.9 %                    |
| <b>H6b<sub>m</sub></b>                    | 35                       | 27.5 | 51   | 58.7 | 0.5732             | 0.1387           | 0.079                                                        | 39.3 %                    |
| <b>CH3</b>                                | 100                      | 100  | 100  | 100  | 0.6315             | 0.3176           | 0.2006                                                       | 100 %                     |

**Table S3.** Experimental and calculated interproton distances for chito-heptasaccharide

| <b>Distance</b> | <b>Experimental<br/>Free state</b> | <b>Experimental<br/>Bound state</b> | <b>Calculated<br/><math>\Phi= 56,6^\circ</math><br/><math>\Psi= 6,9^\circ</math></b> |
|-----------------|------------------------------------|-------------------------------------|--------------------------------------------------------------------------------------|
| H1-H'4          | 2.4                                | 2.35                                | 2.4                                                                                  |
| H1-H'5          | 3.8                                | 3.79                                | 3.9                                                                                  |

**Table S4.** Sequence alignment of LysM1 region of CEBiP homologs

| Receptors        | Amino acid sequence                                 | Binding ligand | Ref.   |
|------------------|-----------------------------------------------------|----------------|--------|
| CEBiP            | YVVQPQDGLDAIARNVFNFAVITYQEIAAAN--NIPDP-NKINVSQTLWIP | Chitin         | (1)    |
| LYM2 (AtCEBiP1)  | YTIKKDDILSFVATEIFGGLVTYEKISEVN--KIPDP-NKIEIGQKFWIP  | Chitin         | (2, 3) |
| MtLYM2           | YKIVPGDTLDAIARVRFAGLVKYQQIQTAN--KIPDA-NNITAGATIWIIP | Chitin         | (4)    |
| LYM1 (At1g21880) | YKTRPSDNLGSIADSVYGGGLVSAEQIQEAN--SVNDP-SLLDVGTSLVIP | PGN            | (2, 5) |
| LYM3 (At1g77630) | YKTRTSDTLGSIADSVYGGGLVSPEIQVAN--SETDL-SVLDVGTKLVIP  | PGN            | (2, 5) |
| OsLYP6           | YSARPADTLASVADVVFAGLASADQIRTANGLSAEDPDAPLDAGATLVVP  | Chitin / PGN   | (6)    |
| OsLYP4           | YVARPGDTLASVASSVYGGGLTTPDWISDSNGILGAKPDAAVDAGTTLFVP | Chitin / PGN   | (6)    |
|                  | * * * * *                                           |                |        |

The black diamond indicates the position corresponding to Ile<sub>122</sub> in CEBiP and the asterisk indicates the conserved amino acid residues.

(1) Kaku et al. (2006) *Proc Natl Acad Sci USA* 103:11086-11091; (2) Shinya et al. (2012) *Plant Cell Physiol* 53:1696-1706; (3) Faulkner et al. (2013) *Proc Natl Acad Sci USA* 110:9916-9970; (4) Fliegmann et al. (2011) *Plant Physiol Biochem* 49:709-720; (5) Willmann et al. (2011) *Proc Natl Acad Sci USA* 108:19824-19829; (6) Liu et al. (2012) *Plant Cell* 24:3406-3419.

**Table S5.** Primers used in this work

**(a) Primer sets for deletion experiments of CEBiP**

| Construct | Forward (5' - 3')        | Reverse (5' - 3')    | Destination vector |
|-----------|--------------------------|----------------------|--------------------|
| ΔL1       | CTGCCCTGCAGCTGCGACAA     | GATGGGGAGGCGGTCCGACT | pMDC32             |
| ΔL2       | CTCCCTGTGTGCCGTTTCATC    | CGGGACATCTAGAATCTGTC | pMDC32             |
| ΔL0       | a GTCGCCCGCTTCAACACCAC   | GAGGATGGCGGACTTGCAGG | pEAQ-HT-DEST1      |
|           | b GGCGCCAACGGCCTCCCGCA   | GAGGTTGCCGTAGGTGGTGG | pEAQ-HT-DEST1      |
|           | c GCCCCCGTCGCCGCAATTC    | GAGGAGGTCGGGGAGGGTGG | pEAQ-HT-DEST1      |
|           | d TTCCGCTGCCGCTGCAACGG   | GGAGGAAAGCGTCCGTCGG  | pEAQ-HT-DEST1      |
| ΔL2       | a ATCGCTGCCAAGTACGGGGT   | CGGGACATCTAGAATCTGTC | pEAQ-HT-DEST1      |
|           | b CTTCTACCAGAAATAAGAT    | CGCCGACGTGTTCTCCCTT  | pEAQ-HT-DEST1      |
|           | c AAATTGCAGATGGACAGAT    | CGTGGACTCCGTCACCCCGT | pEAQ-HT-DEST1      |
|           | d CTCCCTGTGTGCCGTTTCATC  | CGTGGGGTCGTCGATCTTAT | pEAQ-HT-DEST1      |
| ΔC        | -20 AGCCTTGCAACTAATCAGAC | GCAACCGGTGCCGTTCTGCT | pEAQ-HT-DEST1      |
|           | -40 AGCCTTGCAACTAATCAGAC | GCATCCCTTGTCTGTACTG  | pEAQ-HT-DEST1      |
|           | -60 AGCCTTGCAACTAATCAGAC | GCGGATGCAGTTTCTGCGG  | pEAQ-HT-DEST1      |
|           | -80 AGCCTTGCAACTAATCAGAC | ATCAGCTGAGGTATCGCTGA | pEAQ-HT-DEST1      |

**(b) Primer sets for LysM-swapping experiments ( I ; Amplification of inserted fragments, B ; Amplification of backbone vectors )**

| Construct | Forward (5' - 3')                                  | Reverse (5' - 3')                        | Destination vector |
|-----------|----------------------------------------------------|------------------------------------------|--------------------|
| CEBiP     | L2→L1 I GTGATGCACCTCGCTACGTctgtcagccgcagga         | ACGGCACACAGGGAGCGGAAtccacagcgtctggc      | pEAQ-HT-DEST1      |
|           | B CTCCCTGTGTGCCGTTTCATC                            | CGGGACATCTAGAATCTGTC                     |                    |
| LysM      | L1→L2 I GACCGCTCCCATCTACAGctgtcagccgcaagggga       | GCACTGCAGGGCAGCGGACatctagaatctgctc       | pEAQ-HT-DEST1      |
|           | B CTGCCCTGCAGCTGCGACAA                             | GATGGGGAGGCGGTCCGACT                     |                    |
| LysM0     | At2-Os-Os I CCTGCAAGTCCGCCATCCTtactcaagaagaagcaac  | CCGTGTCAGCGGCAGCGGAAtgggacacgtacgactgat  | pEAQ-HT-DEST1      |
|           | B TTCCGCTGCCGCTGCAACGG                             | GAGGATGGCGGACTTGCAGG                     |                    |
| LysM1     | At1-Os-Os I CCTGCAAGTCCGCCATCCTtacaactctacacgacct  | CCGTGTCAGCGGCAGCGGAAtgggattttgaggaagact  | pEAQ-HT-DEST1      |
|           | B TTCCGCTGCCGCTGCAACGG                             | GAGGATGGCGGACTTGCAGG                     |                    |
| LysM2     | Os-At2-Os I AGTCGGACCGCTCCCATCtacaactcaagaagagca   | TTGTGTCAGCTGCAGGGCAGgggatcaaaaattttgac   | pEAQ-HT-DEST1      |
|           | B CTGCCCTGCAGCTGCGACAA                             | GATGGGGAGGCGGTCCGACT                     |                    |
| LysM3     | Os-At1-Os I AGTCGGACCGCTCCCATCtacaactcaagaagagca   | TTGTGTCAGCTGCAGGGCAGgggatacaagaactagctc  | pEAQ-HT-DEST1      |
|           | B CTGCCCTGCAGCTGCGACAA                             | GATGGGGAGGCGGTCCGACT                     |                    |
| LysM4     | Os-Os-At2 I CTAACGTGATGCACCTCGCctacgacatgtagtcaact | GATGAACGGCACACAGGGAaggagacgctgagaggtttat | pEAQ-HT-DEST1      |
|           | B CTCCCTGTGTGCCGTTTCATC                            | CGGGACATCTAGAATCTGTC                     |                    |
| LysM5     | Os-Os-At1 I CTAACGTGATGCACCTCGCctatgttgaagagattga  | GATGAACGGCACACAGGGAaggacagcgagaatctc     | pEAQ-HT-DEST1      |
|           | B CTCCCTGTGTGCCGTTTCATC                            | CGGGACATCTAGAATCTGTC                     |                    |

**(c) Primer sets for site-directed mutagenesis**

| Construct          | Forward (5' - 3')        | Reverse (5' - 3')    | Destination vector |
|--------------------|--------------------------|----------------------|--------------------|
| L <sub>93</sub> A  | GCCGACGCCATCGCGCAACGT    | CCCCTCTGCGGCTGCACGA  | pEAQ-HT-DEST1      |
| Y <sub>107</sub> A | GCCCAGGAGATCGCCGCGGAA    | GGTGACGAAGCGTTGAACA  | pEAQ-HT-DEST1      |
| P <sub>119</sub> A | GCCAAACAAGATAAATGTCAGCCA | GTCGGGGATGTTGTTGCGGG | pEAQ-HT-DEST1      |
| I <sub>122</sub> A | GCCAATGTCAGCCAGACGCTGTG  | CTTGTGGGGTCGGGGATGT  | pEAQ-HT-DEST1      |
| I <sub>122</sub> L | CTTAATGTCAGCCAGACGCTGTG  | CTTGTGGGGTCGGGGATGT  | pEAQ-HT-DEST1      |
| I <sub>122</sub> V | GTCAATGTCAGCCAGACGCTGTG  | CTTGTGGGGTCGGGGATGT  | pEAQ-HT-DEST1      |
| V <sub>124</sub> A | GCCAGCCAGACGCTGTGGATTCC  | ATTATCTGTTGGGGTCGG   | pEAQ-HT-DEST1      |

**(d) Primer sets for gene expression analysis by RT-PCR**

|              | Forward (5' - 3')     | Reverse (5' - 3')     |
|--------------|-----------------------|-----------------------|
| <i>CEBiP</i> | gtttgtacaaaaagcagge * | agccaccgcaggtgaagt    |
| <i>EFLa</i>  | tcgcttgtggaagtttgagac | aacattgtcaccaggagtgcc |

\*This sequence is located attB1 region of destination vectors.
